# Supplementary material for: Intersectoral Collaboration to Promote Child Development: The Contributions of the Actor-Network Theory
Source: PubMed Central journal article supplement — Qual Health Res. 2023 Apr 3;33(5):451–67. doi: 10.1177/10497323231153534 (PMC10126467; doi:10.1177/10497323231153534), 2023-04-03
Supplement: sj-pdf-1-qhr-10.1177_10497323231153534.pdf [file sj-pdf-1-qhr-10.1177_10497323231153534.pdf]

## Supplemental Material

**Supplemental Table 1.** Program of the intervention performed by Projeto Nascente, including distribution of activities, working hours, and topics discussed in seminars. Minas Gerais State, Brazil, August to December 2019.

| Activities                                                               | Working hours | Topics                                                                                                                                                                               |
|--------------------------------------------------------------------------|---------------|--------------------------------------------------------------------------------------------------------------------------------------------------------------------------------------|
| Seminars – 8 in-person seminars (led by facilitators previously trained) | 40 hours      | 1 - National Policy for Comprehensive Child Health Care                                                                                                                              |
|                                                                          |               | 2 - Child Development and Child Health Booklet <sup>1</sup>                                                                                                                          |
|                                                                          |               | 3 - Importance of the bond for child development                                                                                                                                     |
|                                                                          |               | 4 - Parenting                                                                                                                                                                        |
|                                                                          |               | 5 - Strategic planning and elaboration of an intervention project                                                                                                                    |
|                                                                          |               | 6 - Intersectoral collaboration                                                                                                                                                      |
|                                                                          |               | 7 - Promoting evidence-based child development                                                                                                                                       |
|                                                                          |               | 8 - Presentation of intervention projects                                                                                                                                            |
| Fields activities                                                        | 20 hours      | Collection and analysis of data from the areas: population and assistance data, existing services, relationships between services (ecomaps). Elaboration of an intervention project. |

<sup>1</sup>The child health booklet is distributed for free to all children born in Brazil and given to families. It is the tool recommended by the Ministry of Health to monitor the health, growth, and development of children up to 10 years of age.

**Supplemental Table 2.** Distribution of sectors and actors mentioned in ecomaps (N = 48). Minas Gerais State, Brazil, 2019.

| Sector      | Number of ecomaps |      | Actors <sup>1</sup>                                   | Number of ecomaps |      |
|-------------|-------------------|------|-------------------------------------------------------|-------------------|------|
|             | n                 | %    |                                                       | n                 | %    |
| Education   | 46                | 95.8 | Primary Schools                                       | 41                | 85.4 |
|             |                   |      | Children's Day Care Centers                           | 27                | 56.3 |
|             |                   |      | Municipal Department of Education                     | 9                 | 18.8 |
| Social Work | 46                | 95.8 | Social Work Reference Center <sup>2</sup>             | 39                | 81.3 |
|             |                   |      | Specialized Social Work Reference Center <sup>3</sup> | 18                | 37.5 |
|             |                   |      | Municipal Department of Social Work                   | 15                | 31.3 |
|             |                   |      | Home for the aged                                     | 12                | 25.0 |
| Health      | 43                | 89.6 | Secondary Health Care Services <sup>4</sup>           | 22                | 45.8 |
|             |                   |      | Family Health Support Centers <sup>5</sup>            | 21                | 43.8 |
|             |                   |      | Health Municipal Department                           | 18                | 37.5 |
|             |                   |      | Primary Health Care Services <sup>4</sup>             | 16                | 33.3 |
|             |                   |      | Primary Mental Health Professionals                   | 15                | 31.3 |
|             |                   |      | Health Management Services                            | 12                | 25.0 |
|             |                   |      | Community Pharmacy Services                           | 11                | 22.9 |
|             |                   |      | Hospitals                                             | 11                | 22.9 |
|             |                   |      | Psychosocial Care Centers <sup>6</sup>                | 9                 | 18.8 |
|             |                   |      | Clinical Laboratory Centers                           | 7                 | 14.6 |
| Sport /     | 25                | 52.1 | Track and Field                                       | 14                | 29.2 |

|                                |    |      |                                                                         |    |      |
|--------------------------------|----|------|-------------------------------------------------------------------------|----|------|
| Leisure /<br>Culture           |    |      | Sport / Culture Municipal Department                                    | 11 | 22.9 |
|                                |    |      | Libraries                                                               | 9  | 18.8 |
|                                |    |      | Fitness Centers                                                         | 4  | 8.3  |
|                                |    |      | Museums / Theaters                                                      | 3  | 6.3  |
| Other public<br>actors         | 33 | 68.8 | Child Tutelary Council <sup>7</sup>                                     | 28 | 58.3 |
|                                |    |      | Public Safety                                                           | 12 | 25.0 |
|                                |    |      | Municipal Government                                                    | 9  | 18.8 |
|                                |    |      | Municipal Council                                                       | 5  | 10.4 |
|                                |    |      | Municipal Health Council                                                | 3  | 6.3  |
|                                |    |      | Justice System                                                          | 3  | 6.3  |
| Non-<br>governmental<br>sector | 34 | 70.8 | Churches                                                                | 26 | 54.2 |
|                                |    |      | Association of Friends and Families of<br>Disabled Persons <sup>8</sup> | 15 | 31.3 |
|                                |    |      | Alcoholics Anonymous                                                    | 2  | 4.2  |
|                                |    |      | Other Non-governmental Organizations                                    | 9  | 18.8 |
|                                |    |      |                                                                         |    |      |

<sup>1</sup>The Medical Subject Headings (MeSH) of the U.S. National Library of Medicine was chosen to translate the original Brazilian name whenever possible.

<sup>2</sup>The Social Work Reference Center (CRAS, in Portuguese) is the gateway to the Social Work System. It is a public place, located primarily in areas of greater social vulnerability, where Social Work Services are offered to strengthen coexistence with the family and the community (Source: Brazilian Ministry of Citizenship).

<sup>3</sup>The Specialized Social Work Reference Center (CREAS, in Portuguese) is a public unit of the Social Work Policy where families and people at social risk or whose rights have been violated are served (Source: Brazilian Ministry of Citizenship).

<sup>4</sup>The Brazilian public health system is organized in health care networks that seek to overcome healthcare fragmentation and management. It is based on the structuring of Primary Health Care as the first level of care, emphasizing its resolution of most personal care needs. Within Primary Health Care, medical care is performed and coordinated in all points of care. The provision of specialized services (with intermediate technological density) occurs, whenever necessary, in a suitable place and integrated with Primary Health Care. These services include specialized professionals, usually organized by practice areas: medicine, dentistry, rehabilitation (Source: Brazilian Ministry of Health).

<sup>5</sup>The Family Health Support Center (NASF, in Portuguese) was created by the Ministry of Health to support the consolidation of Primary Health Care in Brazil, expand the health offerings in the service network, and provide the resolution, scope, and target of actions. The centers are configured as multi-professional teams that work together with the Family Health Teams and Primary Health Care Teams (Source: Brazilian Ministry of Health).

<sup>6</sup>Psychosocial Care Centers are specialized mental health units for the treatment and social reintegration of people with severe and persistent mental disorders (Source: Fiotec / Fiocruz website).

<sup>7</sup>The Child Tutelary Council was established by the Brazilian Statute of Children and Adolescents to be the main gateway for dealing with cases involving threats or violations of children and adolescents' rights. The Council is responsible for applying the protection measures that turn into referrals for immediate execution by the State, the family, or society (Source: Brazilian Public Ministry).

<sup>8</sup>The Association of Parents and Friends of Disabled Persons is a social organization aiming to promote comprehensive care for people with intellectual and multiple disabilities (Source: website *APAE Brasil – Federação Nacional das Apaes*).
